# Supplementary material for: Early Endothelial Progenitor Cells (eEPCs) in systemic sclerosis (SSc) - dynamics of cellular regeneration and mesenchymal transdifferentiation
Source: Springer Nature journal article supplement (doi:10.1186/s12891-016-1197-2), 2016-08-12
Supplement: MOESM1 [file 10581248]

| No. | type    | gender | ANA       | Sci70 | Cenp-B | lungs | esophagus | joints | kidney | hypertension |
|-----|---------|--------|-----------|-------|--------|-------|-----------|--------|--------|--------------|
| 1   | limited | w      | >1:640    | 0     | pos    |       |           | x      | x      | x            |
| 2   | limited | w      | >1:640    | 0     | 0      |       |           | x      |        | x            |
| 3   | limited | m      | nv        | 0     | na     |       |           |        |        | x            |
| 4   | limited | m      | >1:640    | 0     | 0      |       |           |        |        | x            |
| 5   | limited | w      | >1:640    | 0     | pos    |       |           |        |        |              |
| 6   | limited | w      | >1:640    | 0     | pos    |       | x         | x      |        | x            |
| 7   | limited | w      | >1:640    | 0     | pos    |       |           |        |        |              |
| 8   | limited | w      | >1:640    | 0     | 0      |       |           |        |        |              |
| 9   | limited | w      | >1:640    | 0     | pos    |       | x         |        |        | x            |
| 10  | limited | w      | nv        | 0     | 0      | x     | x         | x      | x      | x            |
| 11  | limited | w      | >1:640    | pos   | pos    |       | x         | x      |        | x            |
| 12  | limited | w      | >1:640    | 0     | pos    |       |           | x      |        |              |
| 13  | limited | w      | <1:640    | 0     | pos    |       |           |        |        | x            |
| 14  | limited | w      | >1:640    | 0     | pos    |       |           | x      |        |              |
| 15  | limited | w      | <1:640    | na    | pos    |       |           |        |        | x            |
| 16  | limited | w      | >1:640    | 0     | pos    |       | x         | x      |        | x            |
| 17  | limited | w      | >1:640    | 0     | pos    |       | x         | x      |        | x            |
| 18  | limited | w      | nv        | na    | na     |       |           |        |        |              |
| 19  | limited | w      | >1:160    | pos   | pos    |       |           |        |        | x            |
| 20  | limited | w      | >1:640    | pos   | pos    |       |           | x      |        | x            |
| 21  | limited | w      | >1:640    | pos   | pos    |       |           |        |        |              |
| 22  | diffuse | w      | >1:20.000 | na    | 0      | x     | x         | x      |        |              |
| 23  | diffuse | w      | <1:640    | pos   | 0      |       |           |        |        |              |
| 24  | diffuse | m      | <1:640    | pos   | 0      |       |           | x      |        | x            |
| 25  | diffuse | w      | >1:640    | 0     | 0      |       |           | x      |        |              |
| 26  | diffuse | m      | >1:640    | 0     | pos    |       | x         |        |        | x            |
| 27  | diffuse | w      | nv        | pos   | pos    | x     | x         | x      |        |              |
| 28  | diffuse | w      | >1:640    | pos   | 0      |       |           |        |        |              |
| 29  | diffuse | w      | >1:640    | pos   | 0      |       |           |        |        | x            |
